# Supplementary material for: Styrylpyrimidine chromophores with bulky electron-donating substituents: experimental and theoretical investigation
Source: Royal Society of Chemistry journal article supplement (doi:10.1039/d3cp03705c), 2023-01-01
Supplement: d3cp03705c1.pdf [file d3cp03705c1.pdf]

## **Styrylpyrimidine chromophores with bulky electron-donating substituents: experimental and theoretical investigation**

Maxime Hodée,<sup>a</sup> Julien Massue,<sup>b\*</sup> Sylvain Achelle,<sup>a\*</sup> Arnaud Fihey,<sup>a\*</sup> Denis Tondelier,<sup>c,d</sup> Gilles Ulrich,<sup>b</sup> Françoise Robin-le Guen<sup>a</sup> and Claudine Katan,<sup>a</sup>

<sup>a</sup> Univ Rennes, ENSCR, CNRS, ISCR (Institut des Sciences Chimiques de Rennes) - UMR 6226, F-35000 Rennes, France. E-mails: [sylvain.achelle@univ-rennes1.fr](mailto:sylvain.achelle@univ-rennes1.fr), [arnaud.fihey@univ-rennes1.fr](mailto:arnaud.fihey@univ-rennes1.fr)

<sup>b</sup> Institut de Chimie et Procédés pour l'Energie, l'Environnement et la Santé (ICPEES), UMR CNRS 7515, Equipe Chimie Organique pour la Biologie, les Matériaux et l'Optique (COMBO) 25 Rue Becquerel, 67087 Strasbourg, Cedex 02, France E-mail: [massue@unistra.fr](mailto:massue@unistra.fr)

<sup>c</sup> Laboratoire de Physique des Interfaces et des Couches Minces (LPICM), CNRS, Ecole Polytechnique, IP Paris, Palaiseau Cedex, France

<sup>d</sup> Université Paris-Saclay, CEA, CNRS, NIMBE, LICSEN, Gif-sur-Yvette, France

### **Supporting Information**

**Table S1:** Angles within the **1-3** series for the ground and first singlet/triplet excited states, characterizing the twist between the styrylpyrimidine and acridine groups computed at the SCS-CC2/def2-TZVP level in gas phase. For *Qeq*, we considered the dihedral angle  $1\hat{2}34$  called  $\theta$  and for *Qax* the angle  $2\hat{3}X$  called  $\phi$ . Atom numbering is defined in Figure S8.

|                                           | <b>1</b>       |                |                | <b>2</b>       |                |                | <b>3</b>       |                |                |
|-------------------------------------------|----------------|----------------|----------------|----------------|----------------|----------------|----------------|----------------|----------------|
|                                           | S <sub>0</sub> | S <sub>1</sub> | T <sub>1</sub> | S <sub>0</sub> | S <sub>1</sub> | T <sub>1</sub> | S <sub>0</sub> | S <sub>1</sub> | T <sub>1</sub> |
| $1\hat{2}34$<br>( $\theta$ , <i>Qeq</i> ) | 89°            | 90°            | 89°            | 73°            | 93°            | 73°            | 81°            | 91°            | 74°            |
| $2\hat{3}X$<br>( $\phi$ , <i>Qax</i> )    | 125°           | 136°           | 125°           | 115°           | 143°           | 115°           | 98°            | 136°           | 98°            |

**Table S2:**  $\omega$ B97X-D/6-311+G(d,p) TD-DFT calculations of vertical excitation and de-excitation for both conformers in gas phase.

| Conformer  | Cmpd     | E <sub>abs</sub> (eV) | $\lambda_{abs}$ (nm) | $f_{abs}$ | State <sub>abs</sub> | E <sub>em</sub> (eV) | $\lambda_{em}$ (nm) | $f_{em}$ |
|------------|----------|-----------------------|----------------------|-----------|----------------------|----------------------|---------------------|----------|
| <i>Qeq</i> | <b>1</b> | 4.41                  | 281                  | 1.51      | S <sub>3</sub>       | 3.30                 | 375                 | 0.20     |
|            | <b>2</b> | 4.42                  | 280                  | 1.44      | S <sub>4</sub>       | 3.00                 | 413                 | 0        |
|            | <b>3</b> | 4.42                  | 281                  | 1.49      | S <sub>3</sub>       | 3.01                 | 411                 | 0        |
| <i>Qax</i> | <b>1</b> | 3.83                  | 319                  | 1.54      | S <sub>1</sub>       | 3.43                 | 361                 | 1.73     |
|            | <b>2</b> | 3.98                  | 311                  | 1.50      | S <sub>1</sub>       | 3.44                 | 361                 | 1.69     |
|            | <b>3</b> | 3.98                  | 311                  | 1.50      | S <sub>1</sub>       | 3.46                 | 358                 | 1.69     |

**Table S3:** M06-2X/6-311+G(d,p) TD-DFT calculations of vertical excitation and de-excitation for both conformers in gas phase.

| Conformer  | Cmpd     | E <sub>abs</sub> (eV) | $\lambda_{abs}$ (nm) | $f_{abs}$ | State <sub>abs</sub> | E <sub>em</sub> (eV) | $\lambda_{em}$ (nm) | $f_{em}$ |
|------------|----------|-----------------------|----------------------|-----------|----------------------|----------------------|---------------------|----------|
| <i>Qeq</i> | <b>1</b> | 4.40                  | 282                  | 1.52      | S <sub>4</sub>       | 2.93                 | 423                 | 0        |
|            | <b>2</b> | 4.41                  | 281                  | 1.46      | S <sub>4</sub>       | 2.60                 | 476                 | 0        |
|            | <b>3</b> | 4.41                  | 281                  | 1.51      | S <sub>4</sub>       | 2.55                 | 486                 | 0        |
| <i>Qax</i> | <b>1</b> | 3.78                  | 328                  | 1.52      | S <sub>1</sub>       | 3.38                 | 367                 | 1.73     |
|            | <b>2</b> | 3.89                  | 319                  | 1.46      | S <sub>1</sub>       | 3.37                 | 368                 | 1.65     |
|            | <b>3</b> | 3.92                  | 316                  | 1.47      | S <sub>1</sub>       | 3.41                 | 364                 | 1.67     |

**Table S4:** B3LYP/6-311+G(d,p) TD-DFT calculations of vertical excitation and de-excitation for both conformers in gas phase.

| Conformer  | Cmpd     | E <sub>abs</sub> (eV) | $\lambda_{abs}$ (nm) | $f_{abs}$ | State <sub>abs</sub> | E <sub>em</sub> (eV) | $\lambda_{em}$ (nm) | $f_{em}$       |
|------------|----------|-----------------------|----------------------|-----------|----------------------|----------------------|---------------------|----------------|
| <i>Qeq</i> | <b>1</b> | 4.01                  | 309                  | 1.49      | S <sub>7</sub>       | 1.88                 | 660                 | 0              |
|            | <b>2</b> | 4.00                  | 310                  | 1.34      | S <sub>8</sub>       | 1.52                 | 818                 | 0              |
|            | <b>3</b> | 4.00                  | 310                  | 1.23      | S <sub>7</sub>       | 1.46                 | 849                 | 0              |
| <i>Qax</i> | <b>1</b> | 3.24                  | 383                  | 1.33      | S <sub>1</sub>       | / <sup>a</sup>       | / <sup>a</sup>      | / <sup>a</sup> |
|            | <b>2</b> | 3.27                  | 379                  | 1.16      | S <sub>1</sub>       | / <sup>a</sup>       | / <sup>a</sup>      | / <sup>a</sup> |
|            | <b>3</b> | 3.32                  | 374                  | 1.22      | S <sub>1</sub>       | 3.25                 | 382                 | 0.16           |

<sup>a</sup> No stable *Qax* conformer found

**Table S5:**  $\omega$ B97X-D/6-311+G(d,p) TD-DFT calculations of excitation and de-excitation for both conformers in toluene.

| Conformer | Cmpd | $E_{\text{abs}}$ (eV) | $\lambda_{\text{abs}}$ (nm) | $f_{\text{abs}}$ | State <sub>abs</sub> | $E_{\text{em}}$ (eV) | $\lambda_{\text{em}}$ (nm) | $f_{\text{em}}$ |
|-----------|------|-----------------------|-----------------------------|------------------|----------------------|----------------------|----------------------------|-----------------|
| Qeq       | 1    | 4.24                  | 292                         | 1.58             | S <sub>2</sub>       | 3.16                 | 392                        | 0.95            |
|           | 2    | 4.27                  | 292                         | 1.54             | S <sub>4</sub>       | 3.02                 | 410                        | 0.67            |
|           | 3    | 4.25                  | 292                         | 1.56             | S <sub>3</sub>       | 3.09                 | 401                        | 0.00            |
| Qax       | 1    | 3.71                  | 334                         | 1.65             | S <sub>1</sub>       | 3.14                 | 395                        | 1.84            |
|           | 2    | 3.81                  | 325                         | 1.60             | S <sub>1</sub>       | 3.15                 | 394                        | 1.82            |
|           | 3    | 3.80                  | 326                         | 1.61             | S <sub>1</sub>       | 3.17                 | 391                        | 1.82            |

**Table S6:** M06-2X/6-311+G(d,p) TD-DFT calculations of vertical excitation and de-excitation for both conformers in toluene.

| Conformer | Cmpd | $E_{\text{abs}}$ (eV) | $\lambda_{\text{abs}}$ (nm) | $f_{\text{abs}}$ | State <sub>abs</sub> | $E_{\text{em}}$ (eV) | $\lambda_{\text{em}}$ (nm) | $f_{\text{em}}$ |
|-----------|------|-----------------------|-----------------------------|------------------|----------------------|----------------------|----------------------------|-----------------|
| Qeq       | 1    | 4.23                  | 293                         | 1.61             | S <sub>2</sub>       | 2.97                 | 418                        | 0.28            |
|           | 2    | 4.25                  | 292                         | 1.57             | S <sub>3</sub>       | 2.70                 | 460                        | 0.00            |
|           | 3    | 4.24                  | 292                         | 1.61             | S <sub>3</sub>       | 2.65                 | 467                        | 0.00            |
| Qax       | 1    | 3.60                  | 344                         | 1.64             | S <sub>1</sub>       | 3.09                 | 401                        | 1.88            |
|           | 2    | 3.71                  | 334                         | 1.58             | S <sub>1</sub>       | 3.10                 | 400                        | 1.84            |
|           | 3    | 3.73                  | 332                         | 1.58             | S <sub>1</sub>       | 3.13                 | 396                        | 1.84            |

**Table S7:** B3LYP/6-311+G(d,p) TD-DFT calculations of vertical excitation and de-excitation for both conformers in toluene.

| Conformer | Cmpd | $E_{\text{abs}}$ (eV) | $\lambda_{\text{abs}}$ (nm) | $f_{\text{abs}}$ | State <sub>abs</sub> | $E_{\text{em}}$ (eV) | $\lambda_{\text{em}}$ (nm) | $f_{\text{em}}$ |
|-----------|------|-----------------------|-----------------------------|------------------|----------------------|----------------------|----------------------------|-----------------|
| Qeq       | 1    | 3.82                  | 324                         | 1.59             | S <sub>5</sub>       | 1.93                 | 642                        | 0.00            |
|           | 2    | 3.84                  | 323                         | 1.54             | S <sub>7</sub>       | 1.61                 | 770                        | 0.00            |
|           | 3    | 3.82                  | 324                         | 1.56             | S <sub>5</sub>       | 1.56                 | 794                        | 0.00            |
| Qax       | 1    | 3.03                  | 409                         | 1.46             | S <sub>1</sub>       | 2.82                 | 440                        | 1.54            |
|           | 2    | 3.08                  | 402                         | 1.31             | S <sub>1</sub>       | / <sup>a</sup>       | / <sup>a</sup>             | / <sup>a</sup>  |
|           | 3    | 3.12                  | 397                         | 1.38             | S <sub>1</sub>       | / <sup>a</sup>       | / <sup>a</sup>             | / <sup>a</sup>  |

<sup>a</sup> no stable Qax conformer found

**Table S8:** Transition energies, oscillator strengths and corresponding states involved for different dihedral angles between the styrylpyrimidine and the acridine groups of the *Qeq* conformer. The dihedral angle is  $1\hat{2}34$ , with atom numbering defined in Figure S8. Values are computed at the SCS-CC2/def2-TZVP level in gas phase.

|   | Dihedral Angle<br>$1\hat{2}34$ ( $^{\circ}$ ) | E (eV) | $f$  | States                |
|---|-----------------------------------------------|--------|------|-----------------------|
| 1 | 75                                            | 3.05   | 0.11 | $S_0 \rightarrow S_1$ |
|   |                                               | 4.10   | 0.12 | $S_0 \rightarrow S_3$ |
|   |                                               | 4.21   | 1.16 | $S_0 \rightarrow S_4$ |
|   |                                               | 4.39   | 0.25 | $S_0 \rightarrow S_5$ |
|   | 105                                           | 3.05   | 0.08 | $S_0 \rightarrow S_1$ |
|   |                                               | 4.10   | 0.11 | $S_0 \rightarrow S_3$ |
|   |                                               | 4.20   | 1.20 | $S_0 \rightarrow S_4$ |
|   |                                               | 4.39   | 0.53 | $S_0 \rightarrow S_5$ |
| 2 | 75                                            | 3.10   | 0.17 | $S_0 \rightarrow S_1$ |
|   |                                               | 4.13   | 0.11 | $S_0 \rightarrow S_4$ |
|   |                                               | 4.24   | 1.13 | $S_0 \rightarrow S_5$ |
|   | 105                                           | 3.10   | 0.07 | $S_0 \rightarrow S_1$ |
|   |                                               | 4.16   | 0.13 | $S_0 \rightarrow S_4$ |
|   |                                               | 4.21   | 1.15 | $S_0 \rightarrow S_5$ |
| 3 | 75                                            | 3.28   | 0.01 | $S_0 \rightarrow S_1$ |
|   |                                               | 4.17   | 0.23 | $S_0 \rightarrow S_4$ |
|   | 105                                           | 3.28   | 0.01 | $S_0 \rightarrow S_1$ |
|   |                                               | 4.17   | 0.28 | $S_0 \rightarrow S_4$ |

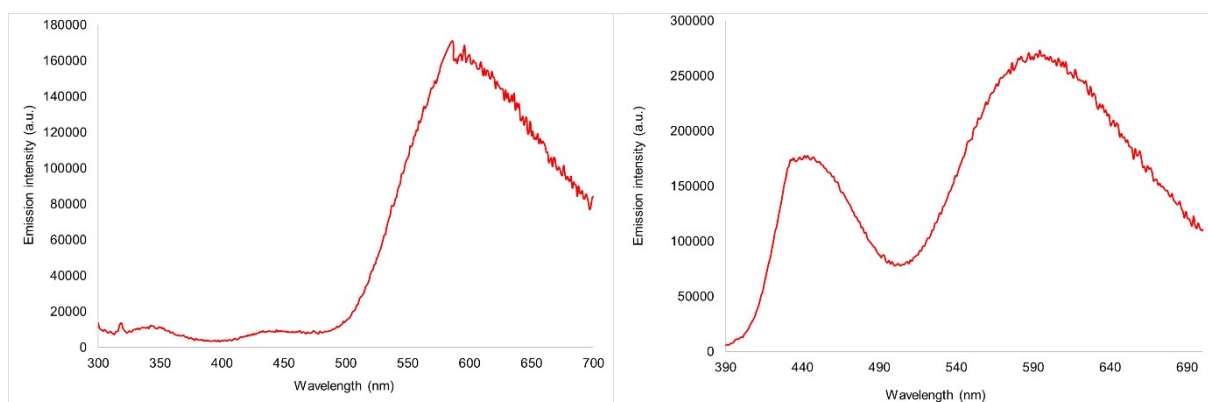

**Figure S1:** Emission spectra of compound **3** in toluene ( $c = 1 \times 10^{-5}$  M) after excitation at 290 nm (left) and 380 nm (right)

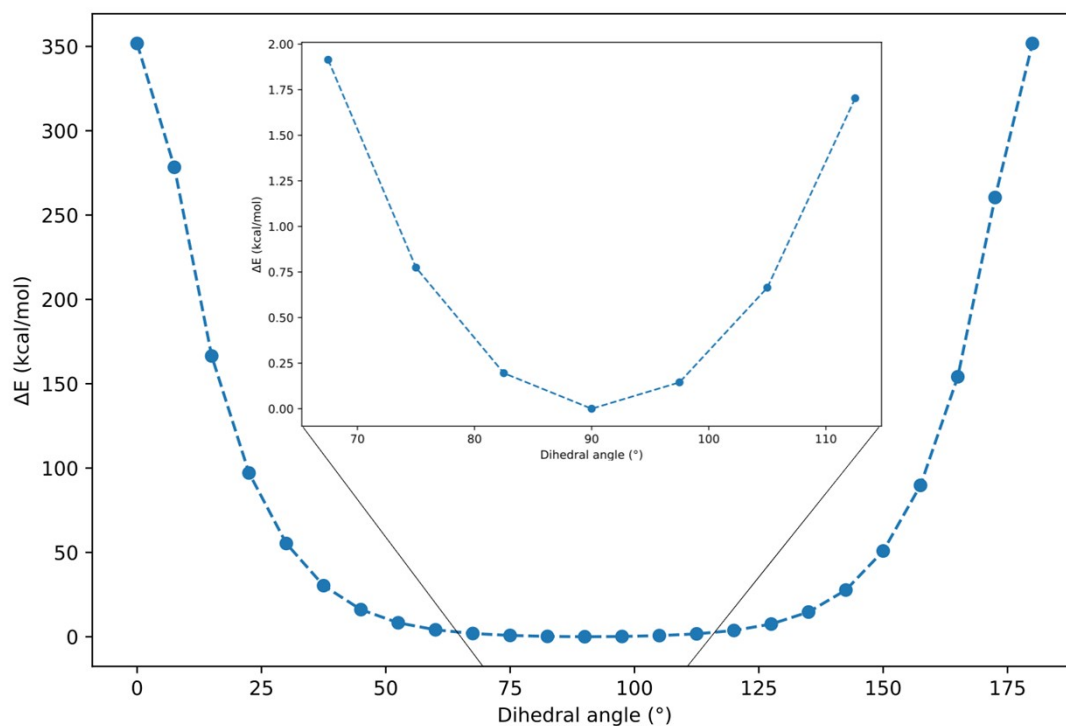

**Figure S2:** Rigid scan of the ground state of compound **1** along the donor-acceptor  $\theta$  angle (Figure S8), at the DFT level ( $\omega$ B97X-D/6-311+G(d,p) (PCM:  $\text{CH}_2\text{Cl}_2$ ).

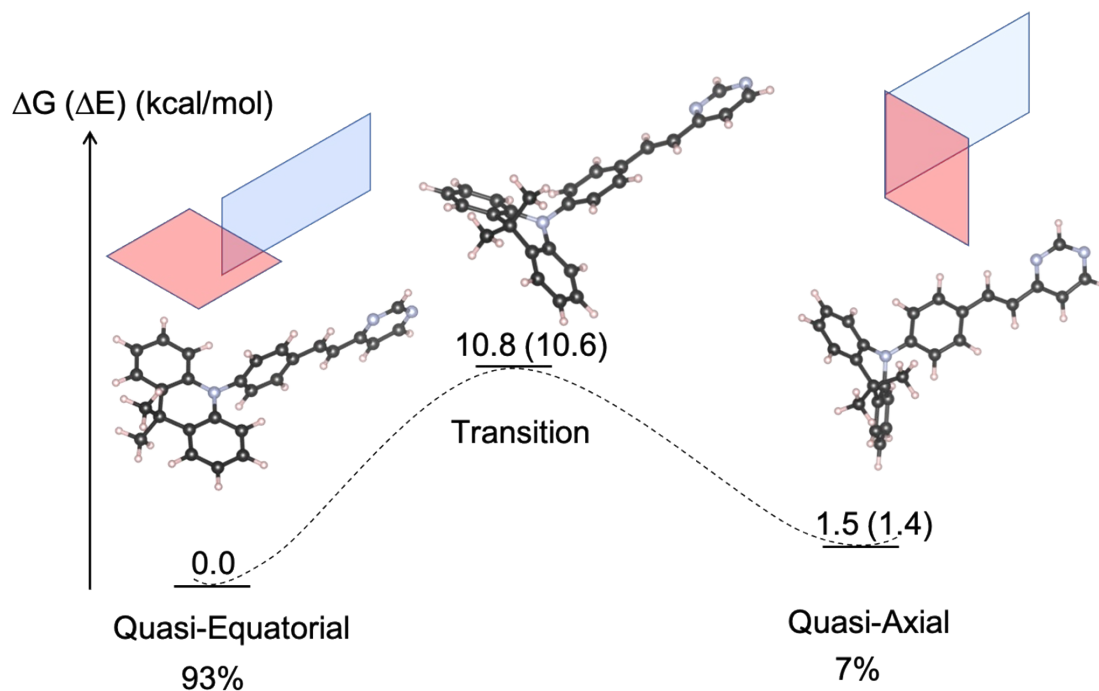

**Figure S3:** Relative total Gibbs free energies (total electronic energies in parenthesis) of the *Qeq* and *Qax* conformers and of the transition state, obtained at the  $\omega$ B97X-D/6-311+G(d,p) level of theory for compound **1**. Boltzmann relative populations obtained with  $\Delta G$  are also presented.

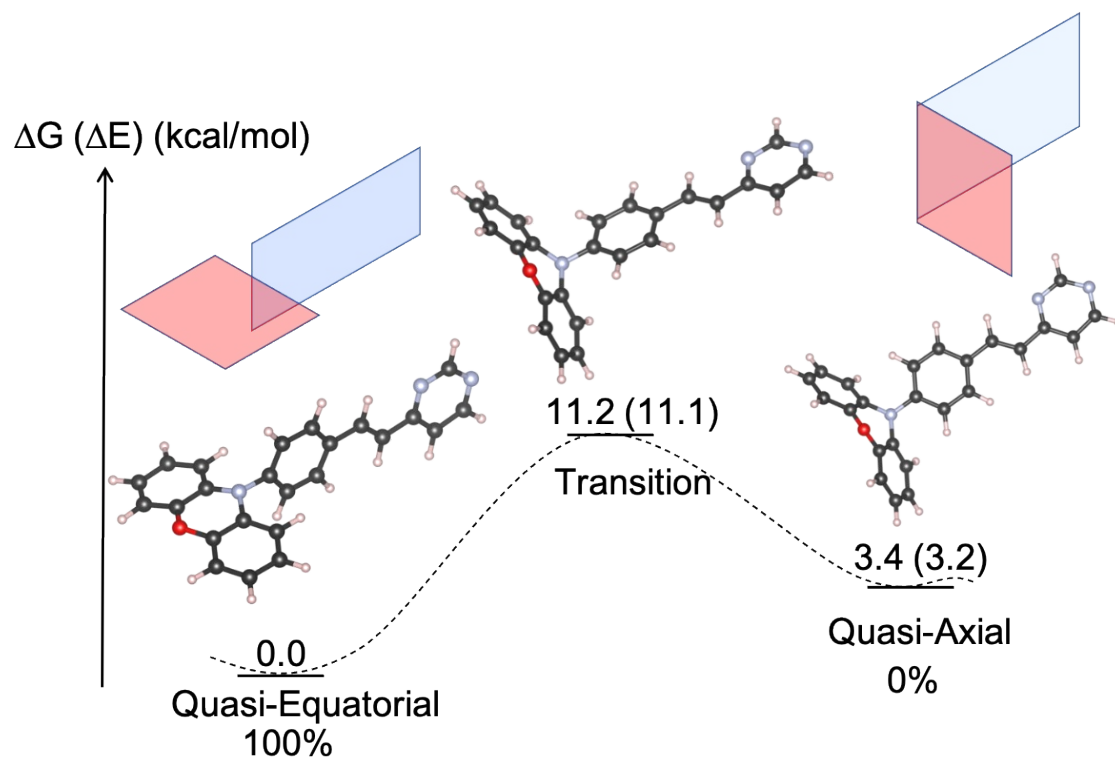

**Figure S4:** Relative total Gibbs free energies (total electronic energies in parenthesis) of the *Qeq* and *Qax* conformers and of the transition state, obtained at the  $\omega$ B97X-D/6-311+G(d,p) level of theory for compound 2. Boltzmann relative populations obtained with  $\Delta G$  are also presented.

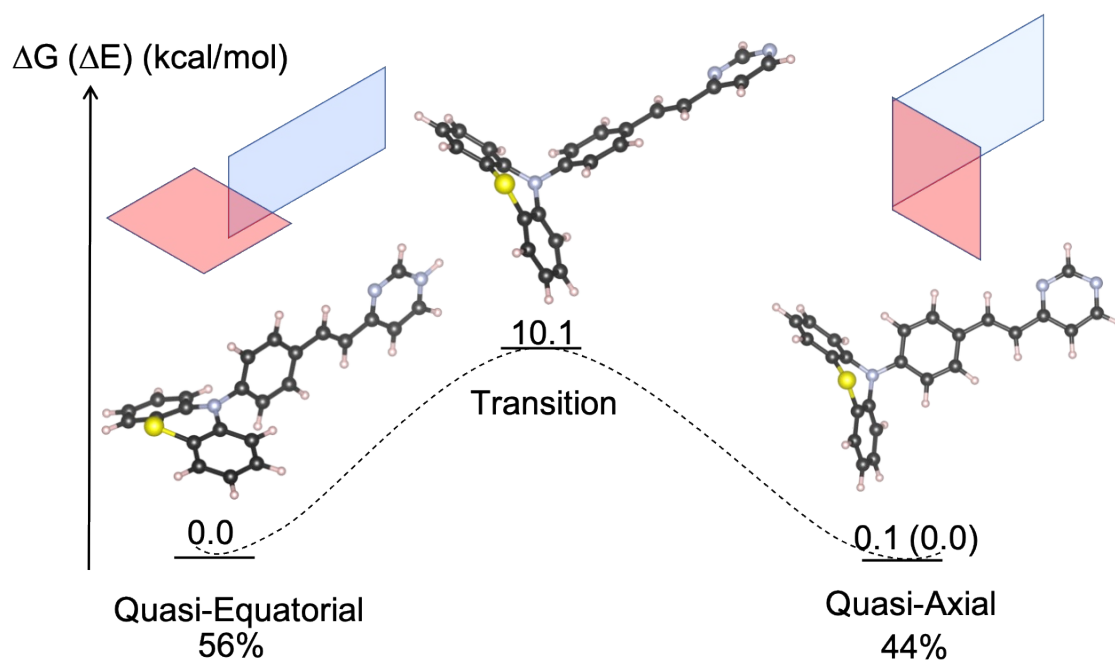

**Figure S5:** Relative total Gibbs free energies (total electronic energies in parenthesis) of the *Qeq* and *Qax* conformers and of the transition state, obtained at the  $\omega$ B97X-D/6-311+G(d,p) level of theory for compound 3. Boltzmann relative populations obtained with  $\Delta G$  are also presented.

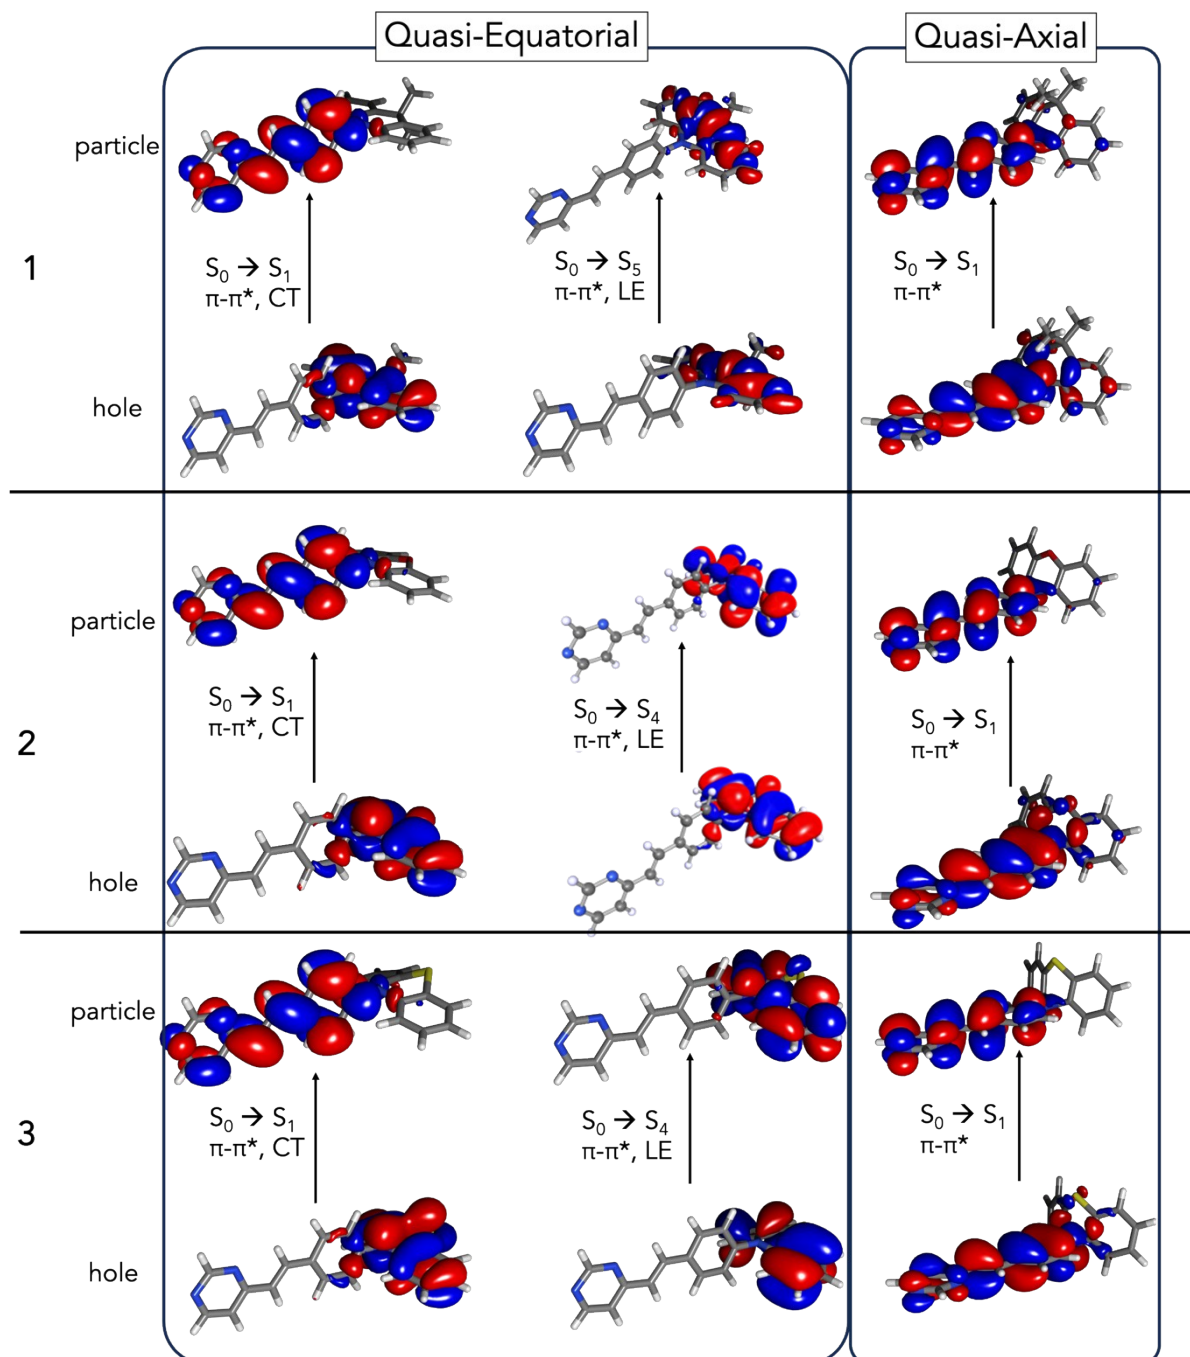

**Figure S6:** NTOs relevant to absorption of compounds 1-3, computed at the SCS-CC2/def2-TZVP level in gas phase. (Isovalue =  $0.02 \text{ e}^-/\text{\AA}^3$ )

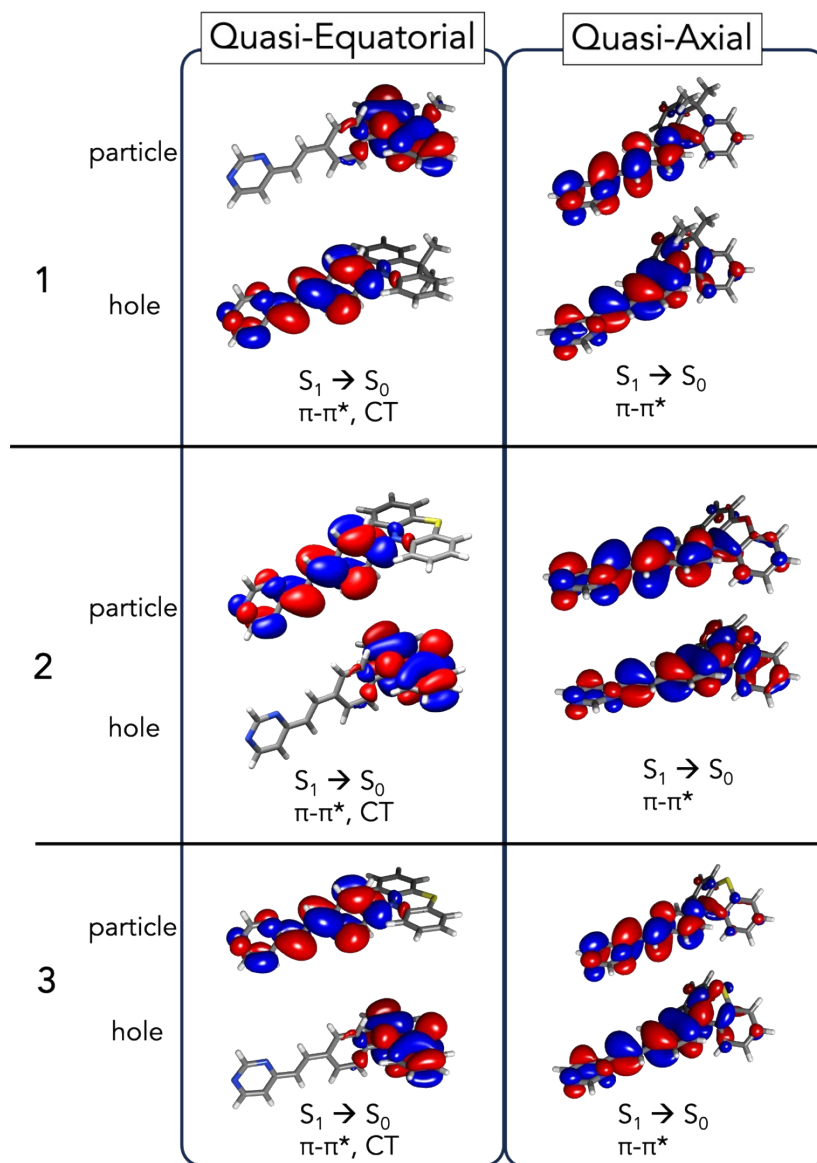

**Figure S7:** NTOs relevant to the emission of compounds **1-3**, computed at the SCS-CC2/def2-TZVP level in gas phase. (Isovalue =  $0.02 \text{ e}^-/\text{\AA}^3$ )

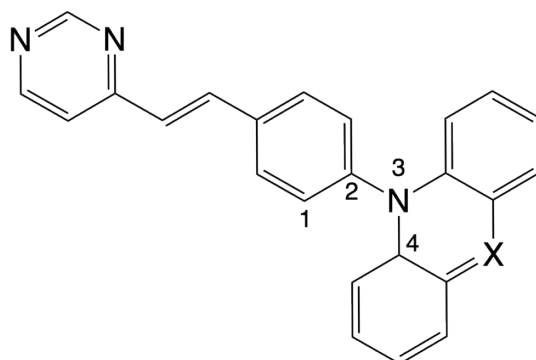

**Figure S8:** Atom numbering used in Table S1 to characterize the twist angle between the donor and acceptor in each of two conformers.



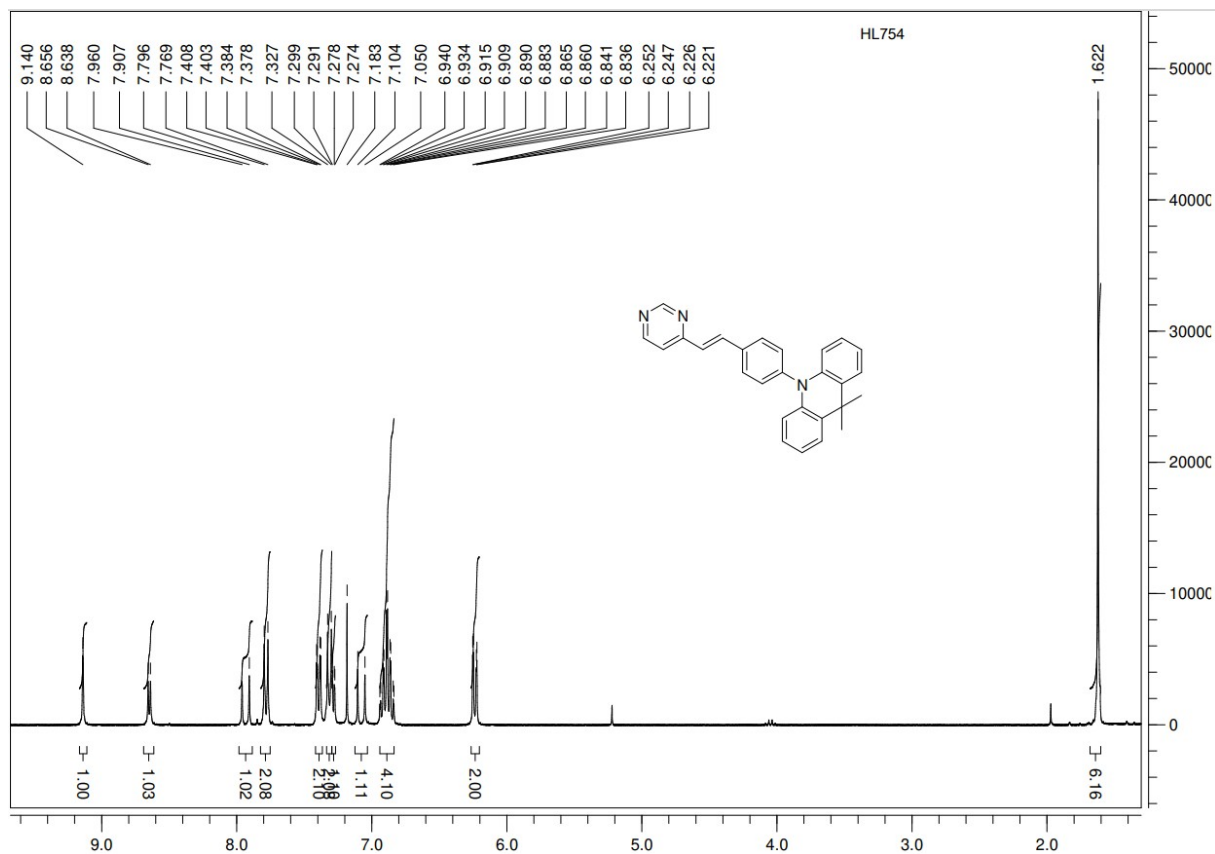

Figure S9:  $^1\text{H}$  nmr spectrum (300 MHz) of **1** in  $\text{CDCl}_3$

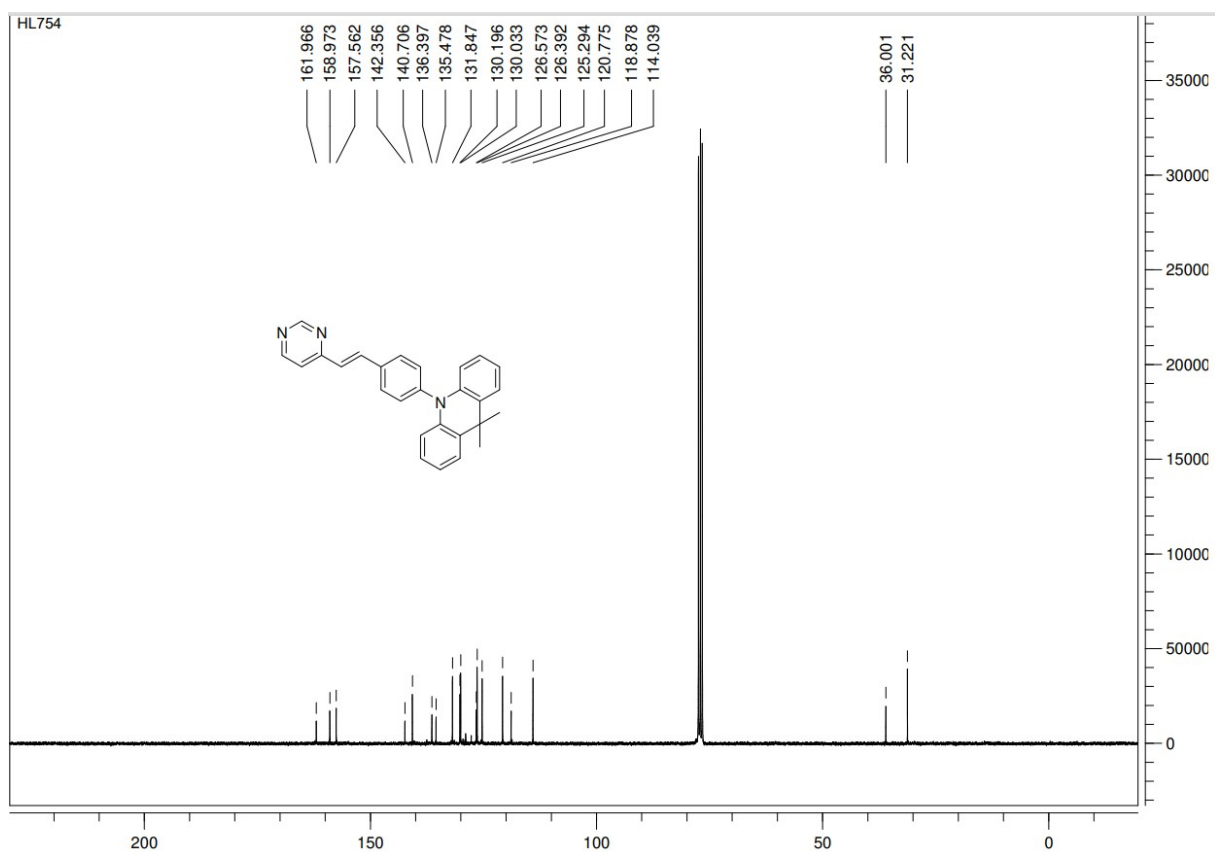

**Figure S10:**  $^{13}\text{C}$  nmr spectrum (75 MHz) of **1** in  $\text{CDCl}_3$ 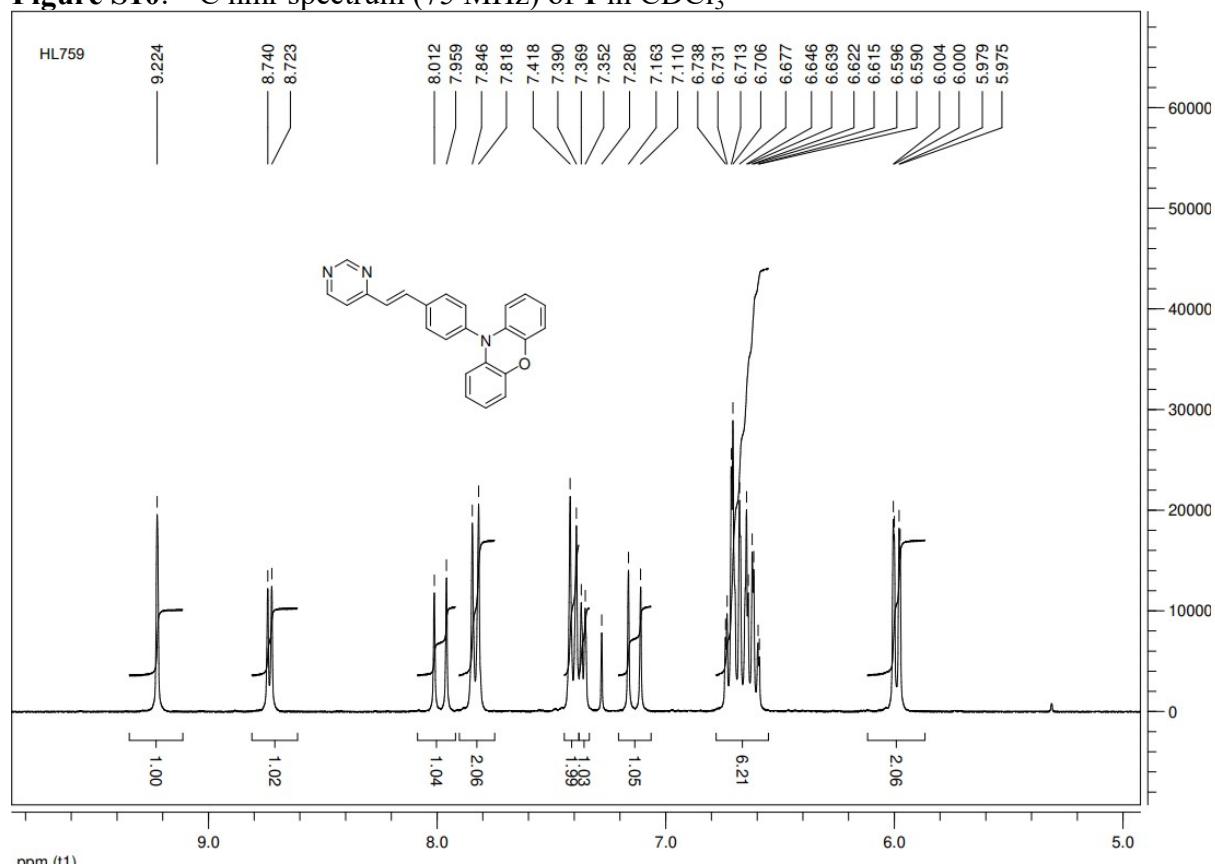**Figure S12:**  $^1\text{H}$  nmr spectrum (300 MHz) of **2** in  $\text{CDCl}_3$ 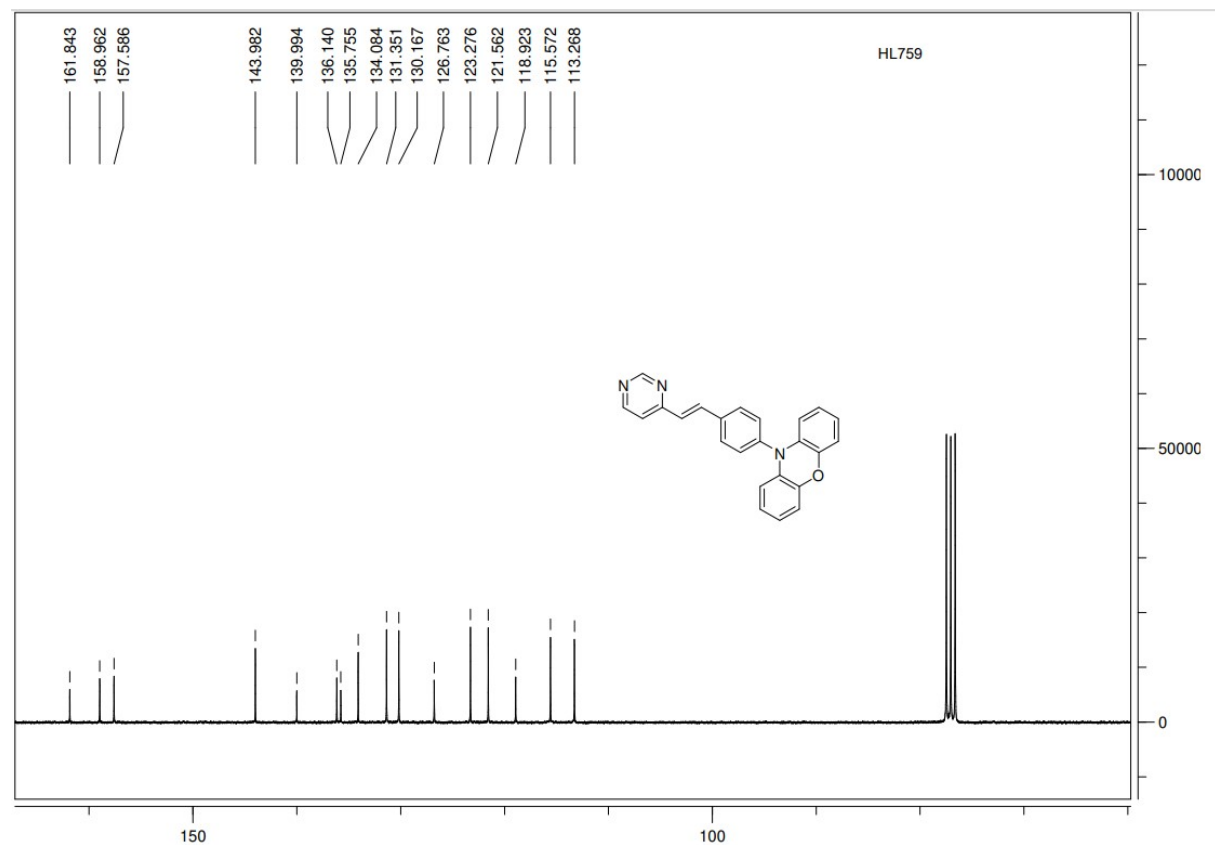**Figure S13:**  $^{13}\text{C}$  nmr spectrum (75 MHz) of **2** in  $\text{CDCl}_3$

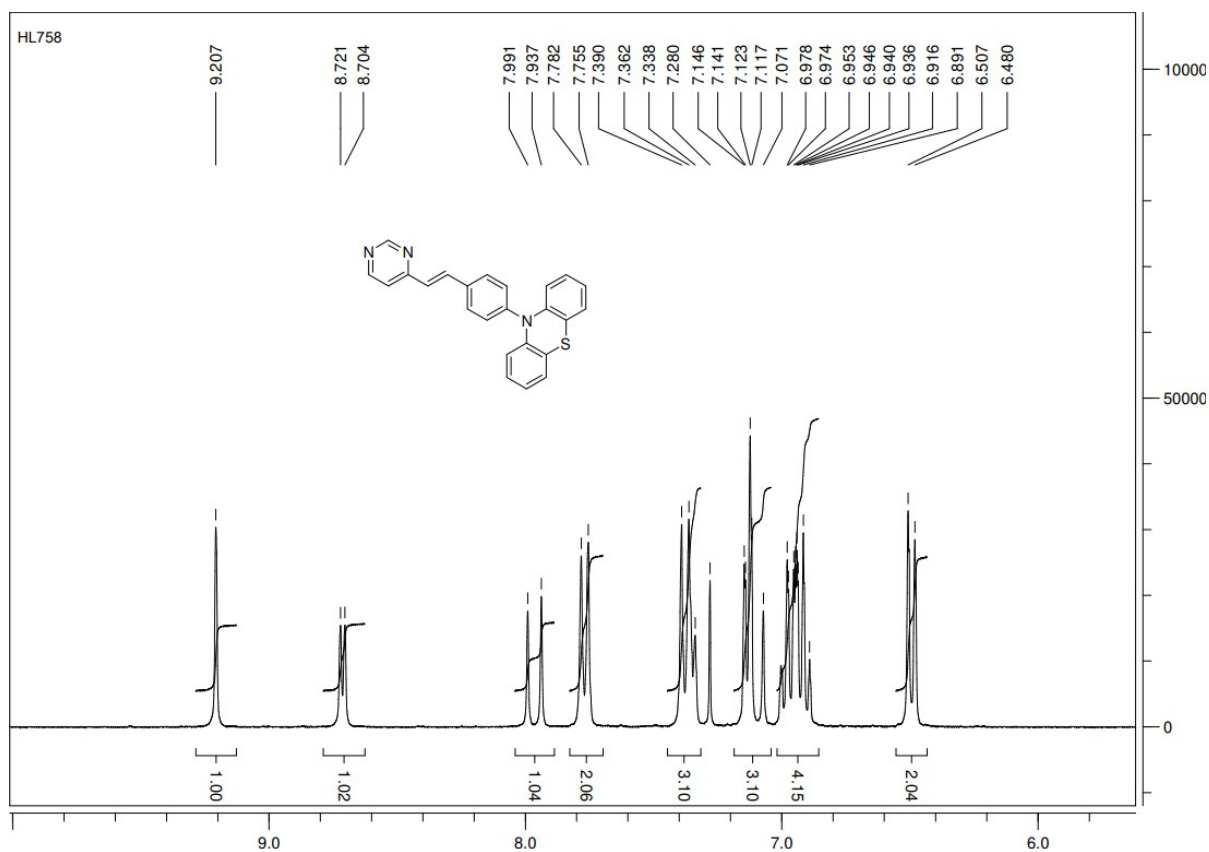

Figure S14:  $^1\text{H}$  nmr spectrum (300 MHz) of **3** in  $\text{CDCl}_3$

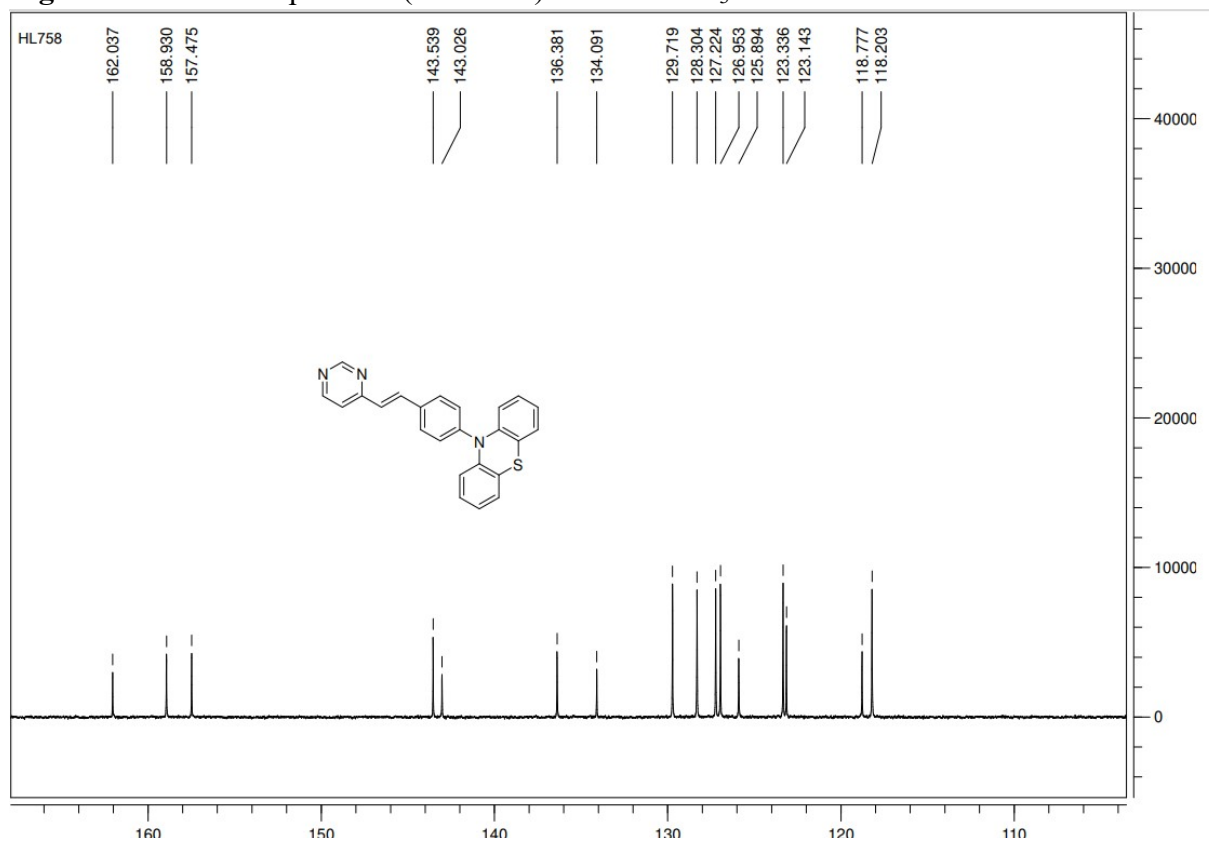

Figure S15:  $^{13}\text{C}$  nmr spectrum (75 MHz) of **3** in  $\text{CDCl}_3$
